# Supplementary material for: Novel Immunomodulatory Proteins Generated via Directed Evolution of Variant IgSF Domains
Source: Front Immunol. 2020 Jan 21;10:3086. doi: 10.3389/fimmu.2019.03086 (PMC6985287; doi:10.3389/fimmu.2019.03086)
Supplement: Supplementary file 1 [file Table_1.xlsx]

## Sheet: Sheet1
	Supplementary Table 1. Variant sequences.
	Format	Sample ID	Gen	number	Variant	ICOSL mutations1	NKp30 mutations2
	ICOSL-Fc	H54	WT ICOSL	WT ICOSL	WT ICOSL	(wild type)	na
	ICOSL-Fc	H59	1st gen	A159	A160	N52H, I143T	na
	ICOSL-Fc	H79	1st gen	A179	A180	N52D	na
	ICOSL-Fc	H82	1st gen	A182	A183	N52Y, N57Y, F138L, L203P	na
	ICOSL-Fc	H83	1st gen	A183	A184	N52H,N57Y, Q100P	na
	ICOSL-Fc	H226	2nd gen	A2226	A2227	N52H, N57Y, Q100R, V110D, C198R, S212G	na
	ICOSL-Fc	H228	2nd gen	A2228	A2229	N52H, N57Y, Q100R, C198R	na
	ICOSL-Fc	H230	2nd gen	A2230	A2231	N52H, Q100R	na
	ICOSL-Fc	H235	2nd gen	A2235	A2236	N52H, N57Y, Q100R, V122A	na
	ICOSL-Fc	H236	2nd gen	A2236	A2237	N52H, N57Y, Q100R, F172S	na
	ICOSL-Fc	H238	2nd gen	A2238	A2239	N52H, N57Y, Q100R	na
	ICOSL-Fc	H240	2nd gen	A2240	A2241	N52S	na
	ICOSL-Fc	H255	3rd gen	A3255	A3256	E16V, N52H, N57Y, Q100R, V110D, H115R, Y152C, K156M, C198R	na
	ICOSL-Fc	H268	3rd gen	A3268	A3269	V11E, N30D, N52H, N57Y, H94E, L96I, L98F, N194D, V210A, I218T	na
	ICOSL-Fc	H304	3rd gen	A3304	A3305	N52H, N57Y, V110A, C198R, R221I	na
	ICOSL-Fc	H309	3rd gen	A3309	A3310	N52H, N57Y, Q100R, L102R, V110D, H115R, C198R,	na
	ICOSL-Fc	H317	3rd gen	A3317	A3318	N52S, E90A	na
	ICOSL-Fc	H320	3rd gen	A3320	A3321	N30D, K42E, N52S	na
	ICOSL-Fc	H321	3rd gen	A3321	A3322	N52S, F120S, I143V, I224V	na
	ICOSL-NKp30-Fc	WT ICOSL-NKp30	NA	WT ICOSL-NKp30	WT ICOSL-NKp30	(wild type)	L30V, A60V, S64P, S86G
	ICOSL-NKp30-Fc	S173	NA	A1173	A1174	N52H,N57Y, Q100P	L30V, A60V, S64P, S86G
	V-mAb	trastuzumab	NA	trastuzumab	trastuzumab	na	na
	V-mAb	N10202	NA	A10202	A10203	N52H, N57Y, Q100R	na
	V-mAb	N10203	NA	A10203	A10204	N52H, N57Y, Q100R	na
	V-mAb	N10204	NA	A10204	A10205	N52H, N57Y, Q100R	na
	V-mAb	N10205	NA	A10205	A10206	N52H, N57Y, Q100R	na
	V-mAb	N10206	NA	A10206	A10207	N52H, N57Y, Q100R	na
	V-mAb	N10207	NA	A10207	A10208	N52H, N57Y, Q100R	na
	V-mAb	N10208	NA	A10208	A10209	N52H, N57Y, Q100R	na
	V-mAb	N10209	NA	A10209	A10210	N52H, N57Y, Q100R	na
						1Numbering relative to mature amino acid start as defined by UniProt entry O75144 (ICOSL_HUMAN)	2Numbering relative to mature amino acid start as defined by UniProt entry O14931 (NCTR3_HUMAN)
